# Supplementary material for: The aromatic amino acid hydroxylase genes AAH1 and AAH2 in Toxoplasma gondii contribute to transmission in the cat
Source: PubMed Central journal article supplement (PMC5363998; doi:10.1371/journal.ppat.1006272), 2017-03-13
Supplement: ppat.1006272.s003.pdf [file ppat.1006272.s003.pdf]

### S3 Table Primers and plasmids used in this study

| Primer Category                                | Primer Name                                   | Primer Sequence                                                                      | Use                                                                                  | Used for plasmid               | Source                |            |
|------------------------------------------------|-----------------------------------------------|--------------------------------------------------------------------------------------|--------------------------------------------------------------------------------------|--------------------------------|-----------------------|------------|
| <u>AAH2 Knockout, Cleanup, Complementation</u> | 222 TgAaaH2 KO fwd cassette fwd primer attB4  | 5'GGGGACAACCTTTGTATAGAAAAGTTGCAATTGTGCTACGCAAGCTCGGC3'                               | AAH2 Knockout                                                                        | <i>pAah2::HXG</i>              | Wang et al. 2014      |            |
|                                                | 223 TgAaaH2 KO fwd cassette rev primer attB1r | 5'GGGGACTGCTTTTTGTACAAACTTGCAAAAGCATTAGGCAAGGCTCGAG3'                                | AAH2 Knockout                                                                        | <i>pAah2::HXG</i>              | Wang et al. 2014      |            |
|                                                | 224 TgAaaH2 KO rev cassette fwd primer attB2r | 5'GGGGACAAGCTTTCTGTACAAAAGTGGAAAGTCGTGCTCCCTCGGATTCG3'                               | AAH2 Knockout                                                                        | <i>pAah2::HXG</i>              | Wang et al. 2014      |            |
|                                                | 225 TgAaaH2 KO rev cassette rev primer attB3  | 5'GGGGACAACCTTTGTATAAATAAAGTTGGGTGAACATCGCGAGATGAAAGACCC3'                           | AAH2 Knockout                                                                        | <i>pAah2::HXG</i>              | Wang et al. 2014      |            |
|                                                | 222 TgAaaH2 KO fwd cassette fwd primer attB4  | 5'GGGGACAACCTTTGTATAGAAAAGTTGCAATTGTGCTTACGCAAGCTCGGC3'                              | AAH2 Cleanup                                                                         | <i>pAah2</i>                   | Wang et al. 2014      |            |
|                                                | 269 TgAaaH2 Clean KO pri1 rev                 | 5'CGAATCGCAGGGGACGACGACTTCAAAGCATTAGGCAAGGCTCGAGG3'                                  | AAH2 Cleanup                                                                         | <i>pAah3</i>                   | Wang et al. 2014      |            |
|                                                | 270 TgAaaH2 Clean KO pri2 fwd                 | 5'AAAGTCGTGCTCCCTCGGATTCG3'                                                          | AAH2 Cleanup                                                                         | <i>pAah4</i>                   | Wang et al. 2014      |            |
|                                                | 271 TgAaaH2 Clean KO pri2 rev attB1r          | 5'GGGGACTGCTTTTTGTACAAACTTGGTGAACATCGGAGATGAAAGACCC3'                                | AAH2 Cleanup                                                                         | <i>pAah5</i>                   | Wang et al. 2014      |            |
|                                                | 260 TgAaaH2 Complement pri1 fwd attB4         | 5'GGGGACAACCTTTGTATAGAAAAGTTGTGCGAGCAGTATCAAATCTGG3'                                 | AAH2 Complement                                                                      | <i>pAAH2</i>                   | Wang et al. 2014      |            |
|                                                | 272 TgAaaH2 Complement pri1 rev               | 5'GCACGACGCGGGTGTAGAGACATCGATTAGAATGGTTCAGGTGATCGGAG3'                               | AAH2 Complement                                                                      | <i>pAAH2</i>                   | Wang et al. 2014      |            |
|                                                | 266 TgAAH1/2 cDNA Fwd                         | 5'ATGTCCTATCCACCGCTCGC3'                                                             | AAH2 Complement                                                                      | <i>pAAH2</i>                   | Wang et al. 2014      |            |
|                                                | 273 TgAAH2 Complement pri3 fwd                | 5'GCCTCTGCTCCCTCAAGATCTAGACAGACACTGTATCTCTACTTGTGATTGG3'                             | AAH2 Complement                                                                      | <i>pAAH2</i>                   | Wang et al. 2014      |            |
|                                                | 265 TgAAH2 Complement pri3 rev attB1r         | 5'GGGGACTGCTTTTTGTACAAACTTGCCTCGCTGACTGTATCTGCTTCG3'                                 | AAH2 Complement                                                                      | <i>pAAH2</i>                   | Wang et al. 2014      |            |
|                                                | A14 HXGPRT 5' Rev screening primer            | 5'CATACTAGTTTCAATGATCCCCCTCACCCGG3'                                                  | HXGPRT Screening                                                                     |                                | Wang et al. 2014      |            |
|                                                | A26 HXGPRT 3' Fwd screening primer            | 5'GATGAATTCAGCAGCAAACTTTCATTTAAAC3'                                                  | HXGPRT Screening                                                                     |                                | Wang et al. 2014      |            |
|                                                | 228 AAH1/2 internal 5' primer                 | 5'GGGGACAACCTTTGTATAGAAAAGTTGCAGGATTCCTCTCACCAGGGG3'                                 | <i>Δaah2</i> Screening                                                               |                                | Wang et al. 2014      |            |
|                                                | 268 AAH2 3' rev                               | 5'CTAGATCTTGAGGGAGACAGGAGGCATATG3'                                                   | <i>Δaah2</i> Screening                                                               |                                | Wang et al. 2014      |            |
|                                                | <u>AAH1 Knockout &amp; Complementation</u>    | X67 AAH1 Knockout 5' fwd pUC19 homology                                              | 5'TTGTAAAACGACGGCCAGTGGCATGTTTCATGCAAGTTGGTGTCTC3'                                   | AAH1 Knockout                  | <i>pAah1::DHFR-Ts</i> | This paper |
|                                                |                                               | X68 AAH1 Knockout 5' rev DHFR homology                                               | 5'GCTATACGAAGTTATGGATCCATCGAGGGACAGACTCGCGTACATCG3'                                  | AAH1 Knockout                  | <i>pAah1::DHFR-Ts</i> | This paper |
|                                                |                                               | X69 AAH1 Knockout 3' fwd DHFR homology                                               | 5'ATTATACGAAGTTATCGATGCTGAGTCTGGTGTCTCCCACTATCTCTGC3'                                | AAH1 Knockout                  | <i>pAah1::DHFR-Ts</i> | This paper |
|                                                |                                               | X70 AAH1 Knockout 3' rev pUC19 homology                                              | 5'GATTACGCCAAGCTTGCATGAGACACTCCGACAGTCAGGAATCC3'                                     | AAH1 Knockout                  | <i>pAah1::DHFR-Ts</i> | This paper |
|                                                |                                               | E06 DHFR-Ts Construct 5'                                                             | 5'GATGGATCCATAACTCGTATAGCATACATTATACGAAGTTATCAGCAGCAAACTTGCATTCAAACCCGCAAH1 Knockout | AAH1 Knockout                  | <i>pAah1::DHFR-Ts</i> | This paper |
|                                                |                                               | E07 DHFR-Ts Construct 3'                                                             | 5'CTAGCATGATAACTCGTATAATGTATGCTATCAAGATTATATCTGCAAGTGCATAGAAAGAAAGTT(AAH1 Knockout)  | AAH1 Knockout                  | <i>pAah1::DHFR-Ts</i> | This paper |
|                                                |                                               | X44 UPRT 5' UTR fwd pUC19 homology                                                   | 5'TTGTAAAACGACGGCCAGTGGGAAACCATATTTGATTGACAGCTTG3'                                   | AAH1 Knockout                  | <i>pDuprt::AAH1</i>   | This paper |
|                                                |                                               | X48 UPRT 5' UTR rev +loxP X25 homology                                               | 5'GACCTCAATTTTGGCGAATAACTCGTATAATGTATGCTATACGAAGTTATTCAGAGATAACGGTTC(AAH1 Knockout)  | AAH1 Knockout                  | <i>pDuprt::AAH1</i>   | This paper |
|                                                |                                               | X25 AAH1 5' UTR fwd                                                                  | 5'ATCCGACAAAATGGAAGTCCGAGAGAAAGAAACAACTCCGTC3'                                       | AAH1 Knockout                  | <i>pDuprt::AAH1</i>   | This paper |
| 283 AAH1 5' UTR rev                            |                                               | 5'CGCAGCGGTTGGATAGAGACATCGATTTAGAAATACACGGTTACCCGAGAC3'                              | AAH1 Knockout                                                                        | <i>pDuprt::AAH1</i>            | This paper            |            |
| 266 AAH1/AAH2 cDNA 5' fwd                      |                                               | 5'ATGTCCTATCCACCGCTCGC3'                                                             | AAH1 Knockout                                                                        | <i>pDuprt::AAH1</i>            | Wang et al. 2014      |            |
| 267 AAH1 cDNA 3' rev                           |                                               | 5'CTGAACCTGAGGGAAACGGGACAGACTCG3'                                                    | AAH1 Knockout                                                                        | <i>pDuprt::AAH1</i>            | Wang et al. 2014      |            |
| 284 AAH1 3' UTR fwd                            |                                               | 5'CGAGCTCGCCGTTTCCCTCAGGTTCTAGGTTACAGACCAGCTACTCATTTCCAGTTG3'                        | AAH1 Knockout                                                                        | <i>pDuprt::AAH1</i>            | This paper            |            |
| X19 AAH1 3' UTR rev                            |                                               | 5'GTTTCTGCTGGAATTCATCGATGGCAACGAACAGTATGTTGC3'                                       | AAH1 Knockout                                                                        | <i>pDuprt::AAH1</i>            | This paper            |            |
| X49 UPRT 3' UTR fwd loxP X19 homology          |                                               | 5'GATGAATCCAGCACGAACAATAAATCGTATAGCATACATTATACGAAGTTATGTTGATATCTTTGTCGCAAH1 Knockout | AAH1 Knockout                                                                        | <i>pDuprt::AAH1</i>            | This paper            |            |
| X47 UPRT 3' UTR rev pUC19 homology             |                                               | 5'GATTACGCCAAGCTTGCATGTGACCGCAGAAAGCACTGCTATCC3'                                     | AAH1 Knockout                                                                        | <i>pDuprt::AAH1</i>            | This paper            |            |
| X58 HXG insertion into pDuprt::AAH1 fwd        |                                               | 5'GAAGAGAAGAAAAAATGGATGAATCCAGCACGAACCTTCG3'                                         | AAH1 Knockout                                                                        | <i>pDuprt::AAH1::HXG</i>       | This paper            |            |
| X59 HXG insertion into pDuprt::AAH1 rev        |                                               | 5'TTCTCGCGGGTGGCCTTGCATACTAGTTTCAATGATCCCCCTC3'                                      | AAH1 Knockout                                                                        | <i>pDuprt::AAH1::HXG</i>       | This paper            |            |
| <u>AAH1/AAH2 Knockout Screening</u>            |                                               | Y46 TgTubulin fwd                                                                    | 5'GGGGACAGCTTTCTGTACAAAAGTGGAAAGCGTAACCTCAGGACGCTTG3'                                | Screening                      |                       | This paper |
|                                                | Y47 TgTubulin rev                             | 5'CGCAGCGGTTGGATAGAGACATAAAAGGGAATTCAGAAAAATGCCAACGAGTAG3'                           | Screening                                                                            |                                | This paper            |            |
|                                                | 228 AAH1/AAH2 fwd (exon)                      | 5'GGGGACAACCTTTGTATAGAAAAGTTGCAGGATTCCTCTCACCAGGGG3'                                 | Screening                                                                            |                                | Wang et al. 2014      |            |
|                                                | 267 AAH1 3' rev                               | 5'CTGAACCTGAGGAAACGGGACAGCTCG3'                                                      | Screening                                                                            |                                | Wang et al. 2014      |            |
|                                                | 268 AAH2 3' rev                               | 5'CTAGATCTTGAGGGAGACAGGAGGCATATG3'                                                   | Screening                                                                            |                                | Wang et al. 2014      |            |
| <u>AAH1/AAH2 Locus Screening</u>               | 228 AAH1/AAH2 fwd (exon)                      | 5'GGGGACAACCTTTGTATAGAAAAGTTGCAGGATTCCTCTCACCAGGGG3'                                 | PCR Amplification                                                                    |                                | Wang et al. 2014      |            |
|                                                | 265 AAH1/AAH2 rev (3' UTR homologous region)  | 5'GGGGACTGCTTTTTGTACAAACTTGCCTTCCTGACTGTATCTGCTTCG3'                                 | PCR Amplification                                                                    |                                | Wang et al. 2014      |            |
|                                                | 228 AAH1/AAH2 fwd (exon)                      | 5'GGGGACAACCTTTGTATAGAAAAGTTGCAGGATTCCTCTCACCAGGGG3'                                 | Sanger Sequencing                                                                    |                                | Wang et al. 2014      |            |
| <u>CRISPR Plasmid Mutagenesis</u>              | X13 CRISPR HXGPRT Targeting Site 1            | 5'CACATCATTTGCATCCTGAAGTTTTAGAGCTAGAAATAGC3'                                         | 5' sgRNA for Q5 mutagenesis                                                          | <i>pSAG1::CAS9,U6:dgAAH1</i>   | This Paper            |            |
|                                                | X14 CRISPR AAH1 Targeting Site 1 (5' UTR)     | 5'TCCCTATTGCTTCTGTACGTTTTAGAGCTAGAAATAGC3'                                           | 5' sgRNA for Q5 mutagenesis                                                          | <i>pSAG1::CAS9,U6:dgAAH1</i>   | This Paper            |            |
|                                                | X15 CRISPR AAH1 Targeting Site 2 (3' UTR)     | 5'TATCAGAGAGCACAGCAACGGTTTTAGAGCTAGAAATAGC3'                                         | 5' sgRNA for Q5 mutagenesis                                                          | <i>pSAG1::CAS9,U6:dgAAH1</i>   | This Paper            |            |
|                                                | X16 CRISPR AAH2 Targeting Site 1 (5' UTR)     | 5'AATTCTCAATTGCAGCACAGTTTTAGAGCTAGAAATAGC3'                                          | 5' sgRNA for Q5 mutagenesis                                                          | <i>pSAG1::CAS9,U6:dgAAH2</i>   | This Paper            |            |
|                                                | X17 CRISPR AAH2 Targeting Site 2 (3' UTR)     | 5'GTTACGTTCTTCTCGTGTTTAGAGCTAGAAATAGC3'                                              | 5' sgRNA for Q5 mutagenesis                                                          | <i>pSAG1::CAS9,U6:dgAAH2</i>   | This Paper            |            |
|                                                | X50 CRISPR HXGPRT Targeting Site 2            | 5'TGTTGTGCACTCTCAATGAGTTTTAGAGCTAGAAATAGC3'                                          | 5' sgRNA for Q5 mutagenesis                                                          | <i>pSAG1::CAS9,U6:dgHXGPRT</i> | This Paper            |            |
|                                                | 3'-Rop18-gRNA rev                             | 5' AACTTGACATCCCAATTAAC3'                                                            | 3' Primer for Q5 mutagenesis                                                         | all CAS9 plasmids              | This Paper            |            |
|                                                | sgRNA cassette KpnI fwd                       | 5'CGAATGGGTACCCCAAGTAAAGCAGAACGACCTCG3'                                              | Amplifying 2ndary sgRNA                                                              | all CAS9 doublecutter plasmids | Behnke et al. 2015*   |            |
|                                                | sgRNA cassette XhoI rev                       | 5'TGCACCTCGAGAATTAACCTCACTAAAGG3'                                                    | Amplifying 2ndary sgRNA                                                              | all CAS9 doublecutter plasmids | Behnke et al. 2015*   |            |

\* Behnke MS, Khan A, Lauron EJ, Jimah JR, Wang Q, et al. (2015) Rhostry Proteins ROP5 and ROP18 Are Major Murine Virulence Factors in Genetically Divergent South American Strains of Toxoplasma gondii. PLOS Genetics 11(8): e1005434. doi: 10.1371/journal.pgen.1005434
