# Supplementary material for: The aromatic amino acid hydroxylase genes AAH1 and AAH2 in Toxoplasma gondii contribute to transmission in the cat
Source: PLoS Pathog. 2017 Mar 13;13(3):e1006272. doi: 10.1371/journal.ppat.1006272 (PMC5363998; doi:10.1371/journal.ppat.1006272)
Supplement: S2 Table — (PDF) [file ppat.1006272.s002.pdf]

## S2 Table Plasmids used in this study

| Plasmid name           | Use                                                   | Source           |
|------------------------|-------------------------------------------------------|------------------|
| <u>CRISPR Plasmids</u> |                                                       |                  |
| pSAG1:CAS9,U6:sgUPRT   | Single-cutter of UPRT                                 | Shen et al. 2014 |
| pSAG1:CAS9,U6:sgAAH2   | Single-cutter of AAH2 in 5' UTR                       | This paper       |
| pSAG1:CAS9,U6:dgAAH2   | Double-cutter of AAH2 in 5' and 3' UTR                | This paper       |
| pSAG1:CAS9,U6:sgAAH1   | Single-cutter of AAH1 in 5' UTR                       | This paper       |
| pSAG1:CAS9,U6:dgAAH1   | Double-cutter of AAH1 in 5' and 3' UTR                | This paper       |
| pSAG1:CAS9,U6:dgHXGPRT | Double-cutter of HXGPRT near 5' and 3' of gene        | This paper       |
| <u>AAH Knockouts</u>   |                                                       |                  |
| pΔaah2::HXG            | Replacement of AAH2 with HXGPRT                       | Wang et al. 2014 |
| pΔaah2                 | Replacement of HXGPRT with blank AAH2 5'/3'UTR fusion | Wang et al. 2014 |
| pAAH2                  | Replacement of HXGPRT with AAH2 cDNA with 5'/3' UTRs  | Wang et al. 2014 |
| pΔaah1::DHFR-Ts        | Replacement of AAH1 with DHFR-Ts                      | This paper       |
| pΔuprt::AAH1           | Intermediate plasmid to build pΔuprt::AAH1::HXG       | This paper       |
| pΔuprt::AAH1::HXG      | Replacement of UPRT with AAH1 cDNA with 5'/ 3' UTRs   | This paper       |
